# Supplementary material for: Budding yeast Dma1 and Dma2 participate in regulation of Swe1 levels and localization
Source: PubMed Central journal article supplement — Mol Biol Cell. 2011 Jul 1;22(13):2185–97. doi: 10.1091/mbc.E11-02-0127 (PMC3128522; doi:10.1091/mbc.e11-02-0127), 2011-07-01
Supplement: E11-02-0127_1.pdf [file E11-02-0127_1.pdf]

A

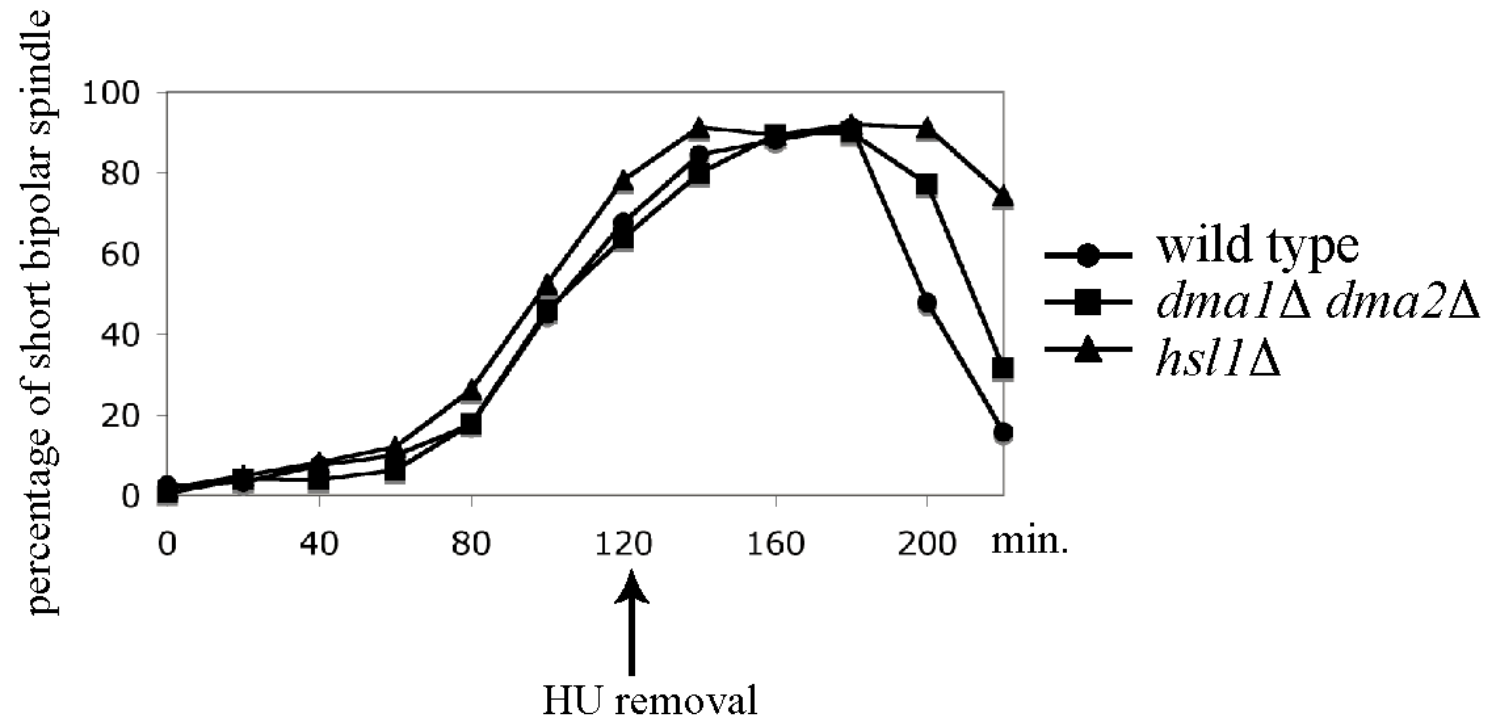

**Suppl. figure 1:** Recovery from HU treatment of *dma1Δ dma2Δ* cells. Exponentially growing cultures of wild type (W303), *hsl1Δ* (ySP4699) and *dma1Δ dma2Δ* (ySP1569) cells were arrested in G1 by  $\alpha$ -factor and released from G1 arrest in YEPD containing 200 mM HU at 25°C (time = 0). After 120 minutes, cells were released from HU (arrow). Cell samples were taken at the indicated times to determine mitotic spindle formation and elongation by indirect immunofluorescence with anti-tubulin antibodies.
